# Supplementary material for: Exceptional response to PD-1 inhibition immunotherapy in advanced metastatic osteosarcoma with tumor site infection
Source: J Immunother Cancer. 2022 Sep 9;10(9):e004673. doi: 10.1136/jitc-2022-004673 (PMC9472102; doi:10.1136/jitc-2022-004673)
Supplement: Supplementary data [file jitc-2022-004673supp002.xlsx]

## Sheet: 20S50001424.bac.final.anno
#Sample	Latin	Coverage	CovRate	Depth	Latin_map_reads_number	Latin_strictly_map_reads_number	GenusLatin	Genus_map_reads_number	Genus_strictly_map_reads_number	Standarized_Latin_map_reads_number	Standarized_Latin_strictly_map_reads_number	Standarized_Genus_map_reads_number	Standarized_Genus_strictly_map_reads_number	Gram	Latin_Read_Abundance	Genus_Read_Abundance	Latin_Absolut_Abundance	Genus_Absolute_Abundance	Depth_Ratio	Shannon_index	RefID	LatinID
20S50001424	Acinetobacter_baumannii	1668275/4335793	38.48	1.97	97873	52414	Acinetobacter	125800	94127	100485	53813	129157	96639	G-	52.96	69.17	1158.78	1513.35	0.72	0.99	id|10670335|BAC|R_4979017|	id|50407874|BAC|S_9440389|
20S50001424	Acinetobacter_nosocomialis	238258/4295422	5.55	1.53	9218	1788	Acinetobacter	125800	94127	9464	1836	129157	96639	G-	5.03	69.17	110.164	1513.35	0.68	0.98	id|22492962|BAC|R_3459297|	id|32029616|BAC|S_0651356|
20S50001424	Acinetobacter_pittii	158234/4212855	3.76	1.58	7990	1730	Acinetobacter	125800	94127	8203	1776	129157	96639	G-	4.45	69.17	97.3596	1513.35	0.65	0.97	id|56834022|BAC|R_6126520|	id|03436274|BAC|S_1720317|
20S50001424	Acinetobacter_towneri	7866/2952107	0.2665	4.48	833	591	Acinetobacter	125800	94127	855	607	129157	96639	G-	0.66	69.17	14.4851	1513.35	0.22	0.11	id|01198905|BAC|R_7764315|	id|64967595|BAC|S_5916133|
20S50001424	Acinetobacter_radioresistens	12572/3450267	0.3644	2.02	510	343	Acinetobacter	125800	94127	524	352	129157	96639	G-	0.35	69.17	7.588	1513.35	0.5	0.66	id|12420631|BAC|R_0272862|	id|33982299|BAC|S_0564958|
20S50001424	Acinetobacter_oleivorans	47461/4152543	1.14	1.46	1622	197	Acinetobacter	125800	94127	1665	202	129157	96639	G-	0.92	69.17	20.0514	1513.35	0.69	0.77	id|69934139|BAC|R_9691143|	id|07941628|BAC|S_3232964|
20S50001424	Acinetobacter_junii	9739/3782588	0.2575	1.92	582	183	Acinetobacter	125800	94127	598	188	129157	96639	G-	0.36	69.17	7.8985	1513.35	0.52	0.46	id|43241446|BAC|R_1925194|	id|62389735|BAC|S_6702589|
20S50001424	Acinetobacter_gyllenbergii	5296/4551466	0.1164	2.88	305	176	Acinetobacter	125800	94127	313	181	129157	96639	G-	0.16	69.17	3.44	1513.35	0.35	0.81	id|00406640|BAC|R_6422167|	id|01452514|BAC|S_1514800|
20S50001424	Acinetobacter_soli	8750/3589578	0.2438	1.7	299	95	Acinetobacter	125800	94127	307	98	129157	96639	G-	0.2	69.17	4.276	1513.35	0.59	0.59	id|39459950|BAC|R_6883360|	id|07686929|BAC|S_8032167|
20S50001424	Acinetobacter_lwoffii	5205/3677790	0.1415	2.21	437	93	Acinetobacter	125800	94127	449	95	129157	96639	G-	0.28	69.17	6.0996	1513.35	0.45	0.95	id|94935131|BAC|R_8256654|	id|42773179|BAC|S_0400613|
20S50001424	Acinetobacter_tandoii	18795/4079192	0.4608	1.89	808	91	Acinetobacter	125800	94127	830	93	129157	96639	G-	0.46	69.17	10.1682	1513.35	0.53	0.42	id|69259056|BAC|R_3391725|	id|96594351|BAC|S_3670773|
20S50001424	Acinetobacter_calcoaceticus	18488/3944021	0.4688	1.33	771	81	Acinetobacter	125800	94127	792	83	129157	96639	G-	0.46	69.17	10.0351	1513.35	0.75	0.99	id|21813386|BAC|R_4313583|	id|34464026|BAC|S_0063680|
20S50001424	Acinetobacter_lactucae	51471/4033016	1.28	1.25	1997	69	Acinetobacter	125800	94127	2050	71	129157	96639	G-	1.16	69.17	25.4189	1513.35	0.81	1	id|40788103|BAC|R_2978971|	id|97090715|BAC|S_3447003|
20S50001424	Acinetobacter_ursingii	13224/3535829	0.374	1.89	579	55	Acinetobacter	125800	94127	594	56	129157	96639	G-	0.38	69.17	8.4061	1513.35	0.53	0.68	id|58784280|BAC|R_2425195|	id|58318179|BAC|S_7032917|
20S50001424	Acinetobacter_schindleri	8699/3394728	0.2563	1.61	403	29	Acinetobacter	125800	94127	414	30	129157	96639	G-	0.28	69.17	6.0941	1513.35	0.62	0.44	id|59784464|BAC|R_4255843|	id|04946454|BAC|S_3813180|
20S50001424	Acinetobacter_indicus	2797/3186787	0.0878	1.85	116	28	Acinetobacter	125800	94127	119	29	129157	96639	G-	0.09	69.17	1.8686	1513.35	0.54	0.78	id|17113957|BAC|R_9184814|	id|48299549|BAC|S_2449578|
20S50001424	Acinetobacter_bohemicus	2518/3729387	0.0675	2.42	123	24	Acinetobacter	125800	94127	126	25	129157	96639	G-	0.08	69.17	1.6931	1513.35	0.41	0.56	id|43727138|BAC|R_3520316|	id|44280952|BAC|S_5836430|
20S50001424	Acinetobacter_haemolyticus	10256/3623942	0.283	1.37	379	15	Acinetobacter	125800	94127	389	15	129157	96639	G-	0.25	69.17	5.3687	1513.35	0.73	0.97	id|64122498|BAC|R_4551155|	id|78616786|BAC|S_1216457|
20S50001424	Acinetobacter_parvus	4860/2912722	0.1669	1.43	276	15	Acinetobacter	125800	94127	283	15	129157	96639	G-	0.22	69.17	4.8643	1513.35	0.7	0.92	id|56687538|BAC|R_8359909|	id|53844109|BAC|S_8137144|
20S50001424	Acinetobacter_baylyi	3769/3598621	0.1047	1.44	110	12	Acinetobacter	125800	94127	113	12	129157	96639	G-	0.07	69.17	1.5692	1513.35	0.69	0.37	id|41778471|BAC|R_0812957|	id|74795234|BAC|S_5643706|
20S50001424	Acinetobacter_gerneri	1331/4595582	0.029	1.77	48	9	Acinetobacter	125800	94127	49	9	129157	96639	G-	0.02	69.17	0.5362	1513.35	0.56	0.35	id|39405168|BAC|R_6985291|	id|98650194|BAC|S_6053665|
20S50001424	Acinetobacter_johnsonii	3618/3398706	0.1065	1.63	193	8	Acinetobacter	125800	94127	198	8	129157	96639	G-	0.13	69.17	2.9151	1513.35	0.61	0.87	id|09215600|BAC|R_6557772|	id|65226855|BAC|S_5801168|
20S50001424	Acinetobacter_defluvii	1407/3354033	0.0419	1.89	54	5	Acinetobacter	125800	94127	55	5	129157	96639	G-	0.04	69.17	0.8265	1513.35	0.53	0.14	id|60044993|BAC|R_0548716|	id|73606078|BAC|S_5773744|
20S50001424	Acinetobacter_bereziniae	1898/4978385	0.0381	1.2	57	1	Acinetobacter	125800	94127	59	1	129157	96639	G-	0.03	69.17	0.5878	1513.35	0.84	0.91	id|58630813|BAC|R_4123410|	id|28708345|BAC|S_9729721|
20S50001424	Acinetobacter_brisouii	457/3148572	0.0145	1.17	11	1	Acinetobacter	125800	94127	11	1	129157	96639	G-	0.01	69.17	0.1793	1513.35	0.85	0.83	id|39360787|BAC|R_6012461|	id|98277088|BAC|S_1313741|
20S50001424	Acinetobacter_proteolyticus	966/4375000	0.0221	1	20	1	Acinetobacter	125800	94127	21	1	129157	96639	G-	0.01	69.17	0.2347	1513.35	1	0.84	id|03531618|BAC|R_0571682|	id|19541000|BAC|S_7215701|
20S50001424	Acinetobacter_apis	134/2413892	0.0056	1	3	0	Acinetobacter	125800	94127	3	0	129157	96639	G-	0	69.17	0.0638	1513.35	-	-	id|08858357|BAC|R_9069095|	id|07608470|BAC|S_4220808|
20S50001424	Acinetobacter_beijerinckii	746/3595236	0.0207	1.07	16	0	Acinetobacter	125800	94127	16	0	129157	96639	G-	0.01	69.17	0.2285	1513.35	0.94	0.89	id|85619720|BAC|R_6648309|	id|19971480|BAC|S_7136129|
20S50001424	Acinetobacter_boissieri	100/2690485	0.0037	1	2	0	Acinetobacter	125800	94127	2	0	129157	96639	G-	0	69.17	0.0382	1513.35	-	-	id|15485889|BAC|R_8418710|	id|85524548|BAC|S_1077797|
20S50001424	Acinetobacter_bouvetii	798/3932684	0.0203	1.47	24	0	Acinetobacter	125800	94127	25	0	129157	96639	G-	0.01	69.17	0.3133	1513.35	0.68	0.56	id|03712323|BAC|R_1340116|	id|80698883|BAC|S_3375799|
20S50001424	Acinetobacter_celticus	100/3093942	0.0032	1	2	0	Acinetobacter	125800	94127	2	0	129157	96639	G-	0	69.17	0.0332	1513.35	-	-	id|27263993|BAC|R_6976609|	id|96643807|BAC|S_8259569|
20S50001424	Acinetobacter_equi	342/3054269	0.0112	1.14	8	0	Acinetobacter	125800	94127	8	0	129157	96639	G-	0.01	69.17	0.1345	1513.35	0.88	0.63	id|10830932|BAC|R_4980356|	id|12197489|BAC|S_3393418|
20S50001424	Acinetobacter_guillouiae	2964/4902433	0.0605	1.19	78	0	Acinetobacter	125800	94127	80	0	129157	96639	G-	0.04	69.17	0.8168	1513.35	0.84	0.41	id|83584915|BAC|R_7572027|	id|21540812|BAC|S_4100554|
20S50001424	Acinetobacter_harbinensis	237/2899835	0.0082	1	5	0	Acinetobacter	125800	94127	5	0	129157	96639	G-	0	69.17	0.0885	1513.35	1	0.86	id|29960251|BAC|R_7774750|	id|83453389|BAC|S_8899292|
20S50001424	Acinetobacter_kookii	221/3085611	0.0072	1.07	5	0	Acinetobacter	125800	94127	5	0	129157	96639	G-	0	69.17	0.0832	1513.35	0.93	0.86	id|60626672|BAC|R_9103123|	id|96751385|BAC|S_6341336|
20S50001424	Acinetobacter_larvae	291/3741098	0.0078	1	6	0	Acinetobacter	125800	94127	6	0	129157	96639	G-	0	69.17	0.0823	1513.35	1	0.92	id|10160825|BAC|R_7262971|	id|49720538|BAC|S_3402150|
20S50001424	Acinetobacter_marinus	283/2994989	0.0094	1.16	7	0	Acinetobacter	125800	94127	7	0	129157	96639	G-	0.01	69.17	0.12	1513.35	0.86	0.91	id|24250964|BAC|R_4163074|	id|43467935|BAC|S_2778808|
20S50001424	Acinetobacter_nectaris	210/2669218	0.0079	1.34	6	0	Acinetobacter	125800	94127	6	0	129157	96639	G-	0.01	69.17	0.1154	1513.35	0.74	0.63	id|80984138|BAC|R_0261051|	id|57060130|BAC|S_7736937|
20S50001424	Acinetobacter_populi	200/3686812	0.0054	1	4	0	Acinetobacter	125800	94127	4	0	129157	96639	G-	0	69.17	0.0557	1513.35	1	0.51	id|65937606|BAC|R_9643227|	id|66053644|BAC|S_8879171|
20S50001424	Acinetobacter_qingfengensis	194/3141501	0.0062	1	4	0	Acinetobacter	125800	94127	4	0	129157	96639	G-	0	69.17	0.0654	1513.35	1	0.51	id|82951149|BAC|R_0912075|	id|51787527|BAC|S_8666574|
20S50001424	Acinetobacter_rudis	438/4066794	0.0108	1.77	16	0	Acinetobacter	125800	94127	16	0	129157	96639	G-	0.01	69.17	0.202	1513.35	0.57	0.55	id|74427534|BAC|R_5804064|	id|05073875|BAC|S_2427811|
20S50001424	Streptococcus_oralis	254644/1931548	13.18	1.34	14068	5901	Streptococcus	22089	11880	14443	6058	22679	12197	G+	17.09	26.25	373.883	574.439	0.81	0.99	id|26995284|BAC|R_5241105|	id|41327418|BAC|S_7770086|
20S50001424	Streptococcus_pneumoniae	42208/2129739	1.98	1.27	1357	302	Streptococcus	22089	11880	1393	310	22679	12197	G+	1.49	26.25	32.7086	574.439	0.8	0.9	id|97827265|BAC|R_6911570|	id|40596151|BAC|S_8428040|
20S50001424	Streptococcus_pseudopneumoniae	38766/2160239	1.79	1.26	1510	228	Streptococcus	22089	11880	1550	234	22679	12197	G+	1.64	26.25	35.8826	574.439	0.8	0.98	id|69770516|BAC|R_8873351|	id|20919127|BAC|S_3951339|
20S50001424	Streptococcus_mitis	36186/1906344	1.9	1.2	2436	196	Streptococcus	22089	11880	2501	201	22679	12197	G+	3	26.25	65.5971	574.439	0.84	1	id|85584824|BAC|R_6377412|	id|71856117|BAC|S_5870034|
20S50001424	Streptococcus_infantis	23908/2023698	1.18	1.23	597	155	Streptococcus	22089	11880	613	159	22679	12197	G+	0.69	26.25	15.1439	574.439	0.82	0.99	id|98492909|BAC|R_0594199|	id|38632365|BAC|S_7649912|
20S50001424	Streptococcus_gordonii	7794/2191405	0.3557	1.27	382	53	Streptococcus	22089	11880	392	54	22679	12197	G+	0.41	26.25	8.9485	574.439	0.79	0.95	id|71839961|BAC|R_6988014|	id|78621575|BAC|S_5676109|
20S50001424	Streptococcus_anginosus	2784/2181146	0.1276	1.42	110	49	Streptococcus	22089	11880	113	50	22679	12197	G+	0.12	26.25	2.5889	574.439	0.7	0.54	id|64043348|BAC|R_6430939|	id|49766187|BAC|S_3291560|
20S50001424	Streptococcus_sanguinis	3635/2449527	0.1484	1.43	175	34	Streptococcus	22089	11880	180	35	22679	12197	G+	0.17	26.25	3.6675	574.439	0.7	0.84	id|77521835|BAC|R_4607855|	id|24531979|BAC|S_9217069|
20S50001424	Streptococcus_cristatus	4878/2295071	0.2125	1.26	209	33	Streptococcus	22089	11880	215	34	22679	12197	G+	0.21	26.25	4.6748	574.439	0.79	0.98	id|14724206|BAC|R_9641146|	id|38916561|BAC|S_4298854|
20S50001424	Streptococcus_peroris	9740/1639940	0.5939	1.25	247	29	Streptococcus	22089	11880	254	30	22679	12197	G+	0.35	26.25	7.7317	574.439	0.8	0.97	id|82281087|BAC|R_5071168|	id|11370936|BAC|S_5421551|
20S50001424	Streptococcus_australis	3924/2161464	0.1815	1.2	223	26	Streptococcus	22089	11880	229	27	22679	12197	G+	0.24	26.25	5.2962	574.439	0.83	0.87	id|67501597|BAC|R_2673362|	id|55753248|BAC|S_3346604|
20S50001424	Streptococcus_parasanguinis	4026/2277150	0.1768	1.19	237	25	Streptococcus	22089	11880	243	26	22679	12197	G+	0.24	26.25	5.3428	574.439	0.84	0.85	id|49557611|BAC|R_3352556|	id|39376444|BAC|S_8063262|
20S50001424	Streptococcus_constellatus	2043/1991156	0.1026	1.4	64	13	Streptococcus	22089	11880	66	13	22679	12197	G+	0.08	26.25	1.65	574.439	0.71	0.81	id|49322081|BAC|R_3420975|	id|84435803|BAC|S_3401106|
20S50001424	Streptococcus_intermedius	1700/2052577	0.0828	1.13	39	5	Streptococcus	22089	11880	40	5	22679	12197	G+	0.04	26.25	0.9754	574.439	0.89	0.43	id|91653517|BAC|R_4626247|	id|43718688|BAC|S_9511482|
20S50001424	Streptococcus_sinensis	3567/2062993	0.1729	1.21	88	5	Streptococcus	22089	11880	90	5	22679	12197	G+	0.1	26.25	2.1897	574.439	0.83	0.97	id|96435442|BAC|R_0687833|	id|24477962|BAC|S_5814709|
20S50001424	Streptococcus_sp._I-P16	3192/2023580	0.1577	1.08	70	4	Streptococcus	22089	11880	72	4	22679	12197	G+	0.08	26.25	1.7758	574.439	0.92	0.98	id|97455640|BAC|R_4236140|	id|45050604|BAC|S_1511555|
20S50001424	Streptococcus_massiliensis	609/2033908	0.0299	1.1	14	3	Streptococcus	22089	11880	14	3	22679	12197	G+	0.02	26.25	0.3534	574.439	0.91	0.6	id|91555377|BAC|R_4578852|	id|38971507|BAC|S_9413703|
20S50001424	Streptococcus_vestibularis	1451/2022389	0.0717	1.14	33	3	Streptococcus	22089	11880	34	3	22679	12197	G+	0.04	26.25	0.8376	574.439	0.88	0.91	id|53557617|BAC|R_7913744|	id|24720556|BAC|S_7802260|
20S50001424	Streptococcus_pasteurianus	260/2288924	0.0114	1.31	7	2	Streptococcus	22089	11880	7	2	22679	12197	G+	0.01	26.25	0.157	574.439	0.76	0	id|48044282|BAC|R_3563462|	id|64811970|BAC|S_2849868|
20S50001424	Streptococcus_acidominimus	383/2445722	0.0157	1	11	1	Streptococcus	22089	11880	11	1	22679	12197	G+	0.01	26.25	0.2309	574.439	1	0.82	id|80174120|BAC|R_1917752|	id|02501244|BAC|S_2509053|
20S50001424	Streptococcus_canis	59/2410272	0.0024	1.69	2	1	Streptococcus	22089	11880	2	1	22679	12197	G+	0	26.25	0.0426	574.439	-	-	id|83110216|BAC|R_7798594|	id|16816295|BAC|S_4758702|
20S50001424	Streptococcus_criceti	150/2432036	0.0062	1.27	4	1	Streptococcus	22089	11880	4	1	22679	12197	G+	0	26.25	0.0844	574.439	0.79	0.63	id|25226566|BAC|R_1325957|	id|21307637|BAC|S_9406327|
20S50001424	Streptococcus_himalayensis	294/2275471	0.0129	1	6	1	Streptococcus	22089	11880	6	1	22679	12197	G+	0.01	26.25	0.1354	574.439	1	0.92	id|44988662|BAC|R_0814127|	id|12561076|BAC|S_4451595|
20S50001424	Streptococcus_salivarius	972/2377929	0.0409	1.04	29	1	Streptococcus	22089	11880	30	1	22679	12197	G+	0.03	26.25	0.626	574.439	0.96	0.65	id|31063082|BAC|R_8619712|	id|87078916|BAC|S_8037111|
20S50001424	Streptococcus_agalactiae	200/2275139	0.0088	1	4	0	Streptococcus	22089	11880	4	0	22679	12197	G+	0	26.25	0.0903	574.439	1	0	id|67066689|BAC|R_1600703|	id|92200674|BAC|S_8067702|
20S50001424	Streptococcus_caballi	144/2122654	0.0068	1	3	0	Streptococcus	22089	11880	3	0	22679	12197	G+	0	26.25	0.0726	574.439	-	-	id|44104646|BAC|R_1554507|	id|98882085|BAC|S_6473623|
20S50001424	Streptococcus_didelphis	98/1877578	0.0052	1	2	0	Streptococcus	22089	11880	2	0	22679	12197	G+	0	26.25	0.0547	574.439	-	-	id|44596719|BAC|R_0400992|	id|48187325|BAC|S_3144015|
20S50001424	Streptococcus_downei	92/2239581	0.0041	1	2	0	Streptococcus	22089	11880	2	0	22679	12197	G+	0	26.25	0.0458	574.439	-	-	id|64720659|BAC|R_3843059|	id|32263266|BAC|S_6982457|
20S50001424	Streptococcus_dysgalactiae	200/2252208	0.0089	1	4	0	Streptococcus	22089	11880	4	0	22679	12197	G+	0	26.25	0.0912	574.439	1	0.95	id|37421884|BAC|R_8981753|	id|53752846|BAC|S_4923290|
20S50001424	Streptococcus_entericus	200/2036788	0.0098	1	4	0	Streptococcus	22089	11880	4	0	22679	12197	G+	0	26.25	0.1008	574.439	1	0.63	id|39778560|BAC|R_0722417|	id|75185004|BAC|S_1959612|
20S50001424	Streptococcus_equinus	250/2042429	0.0122	1	8	0	Streptococcus	22089	11880	8	0	22679	12197	G+	0.01	26.25	0.2011	574.439	1	0.46	id|56599575|BAC|R_9612346|	id|10617423|BAC|S_8310017|
20S50001424	Streptococcus_ferus	101/1872314	0.0054	1.49	3	0	Streptococcus	22089	11880	3	0	22679	12197	G+	0	26.25	0.0823	574.439	-	-	id|25445615|BAC|R_1637963|	id|48679952|BAC|S_9168017|
20S50001424	Streptococcus_gallolyticus	217/2178945	0.01	1.13	6	0	Streptococcus	22089	11880	6	0	22679	12197	G+	0.01	26.25	0.1414	574.439	0.88	0.96	id|61129512|BAC|R_5531522|	id|54267854|BAC|S_7660316|
20S50001424	Streptococcus_halotolerans	150/2182100	0.0069	1	3	0	Streptococcus	22089	11880	3	0	22679	12197	G+	0	26.25	0.0706	574.439	-	-	id|40541255|BAC|R_7789591|	id|20937589|BAC|S_0091094|
20S50001424	Streptococcus_henryi	478/2429895	0.0197	1	10	0	Streptococcus	22089	11880	10	0	22679	12197	G+	0.01	26.25	0.2113	574.439	1	0.99	id|51787592|BAC|R_0968531|	id|12465801|BAC|S_4008480|
20S50001424	Streptococcus_infantarius	198/1988420	0.01	1.2	5	0	Streptococcus	22089	11880	5	0	22679	12197	G+	0.01	26.25	0.1291	574.439	0.83	0.96	id|99688919|BAC|R_0635488|	id|43387261|BAC|S_0069303|
20S50001424	Streptococcus_iniae	100/2266654	0.0044	1	2	0	Streptococcus	22089	11880	2	0	22679	12197	G+	0	26.25	0.0453	574.439	-	-	id|53883561|BAC|R_0227393|	id|61209975|BAC|S_6222017|
20S50001424	Streptococcus_lutetiensis	98/1975547	0.005	1	2	0	Streptococcus	22089	11880	2	0	22679	12197	G+	0	26.25	0.052	574.439	-	-	id|01392031|BAC|R_0140439|	id|51920042|BAC|S_4684744|
20S50001424	Streptococcus_macacae	153/1930701	0.0079	1.25	4	0	Streptococcus	22089	11880	4	0	22679	12197	G+	0	26.25	0.1064	574.439	0.8	0	id|28447816|BAC|R_5811404|	id|58029041|BAC|S_3183800|
20S50001424	Streptococcus_macedonicus	50/2163990	0.0023	1	1	0	Streptococcus	22089	11880	1	0	22679	12197	G+	0	26.25	0.0237	574.439	-	-	id|15739694|BAC|R_7391224|	id|27252920|BAC|S_2043595|
20S50001424	Streptococcus_marmotae	246/2309282	0.0107	1	5	0	Streptococcus	22089	11880	5	0	22679	12197	G+	0.01	26.25	0.1111	574.439	1	0.86	id|58932230|BAC|R_1452996|	id|67143429|BAC|S_1254783|
20S50001424	Streptococcus_merionis	146/2384128	0.0061	1	3	0	Streptococcus	22089	11880	3	0	22679	12197	G+	0	26.25	0.0646	574.439	-	-	id|83782454|BAC|R_3061123|	id|43566686|BAC|S_2739147|
20S50001424	Streptococcus_minor	314/1960463	0.016	1.1	7	0	Streptococcus	22089	11880	7	0	22679	12197	-	0.01	26.25	0.1833	574.439	0.91	0.87	id|36601987|BAC|R_6422100|	id|85364521|BAC|S_8844469|
20S50001424	Streptococcus_mutans	204/2330422	0.0088	1.12	5	0	Streptococcus	22089	11880	5	0	22679	12197	G+	0.01	26.25	0.1101	574.439	0.89	0.61	id|63917338|BAC|R_0292150|	id|15485026|BAC|S_1387232|
20S50001424	Streptococcus_orisratti	292/2417024	0.0121	1	6	0	Streptococcus	22089	11880	6	0	22679	12197	G+	0.01	26.25	0.1274	574.439	1	0.41	id|29872252|BAC|R_3403698|	id|88309252|BAC|S_0713297|
20S50001424	Streptococcus_ovis	232/2358768	0.0098	1	5	0	Streptococcus	22089	11880	5	0	22679	12197	G+	0	26.25	0.1088	574.439	1	0.96	id|18978358|BAC|R_6383422|	id|14472122|BAC|S_1569630|
20S50001424	Streptococcus_pantholopis	186/2241302	0.0083	1	4	0	Streptococcus	22089	11880	4	0	22679	12197	G+	0	26.25	0.0916	574.439	1	0.51	id|80208772|BAC|R_3016269|	id|12007691|BAC|S_7065676|
20S50001424	Streptococcus_parauberis	85/2521384	0.0034	1	2	0	Streptococcus	22089	11880	2	0	22679	12197	G+	0	26.25	0.0407	574.439	-	-	id|47302665|BAC|R_2691192|	id|85949277|BAC|S_4684844|
20S50001424	Streptococcus_phocae	100/1700982	0.0059	1.42	3	0	Streptococcus	22089	11880	3	0	22679	12197	G+	0	26.25	0.0905	574.439	-	-	id|33614158|BAC|R_4022739|	id|06951168|BAC|S_6865608|
20S50001424	Streptococcus_plurextorum	147/2103784	0.007	1	3	0	Streptococcus	22089	11880	3	0	22679	12197	G+	0	26.25	0.0732	574.439	-	-	id|29245966|BAC|R_5303710|	id|83306130|BAC|S_5480868|
20S50001424	Streptococcus_porci	97/2291276	0.0042	1	2	0	Streptococcus	22089	11880	2	0	22679	12197	G+	0	26.25	0.0448	574.439	-	-	id|85174972|BAC|R_5624200|	id|80226903|BAC|S_6058002|
20S50001424	Streptococcus_porcinus	150/2033046	0.0074	1	3	0	Streptococcus	22089	11880	3	0	22679	12197	G+	0	26.25	0.0757	574.439	-	-	id|97785868|BAC|R_5166341|	id|74635207|BAC|S_1586077|
20S50001424	Streptococcus_pseudoporcinus	100/2156061	0.0046	1	2	0	Streptococcus	22089	11880	2	0	22679	12197	G+	0	26.25	0.0476	574.439	-	-	id|08865801|BAC|R_9816415|	id|38633559|BAC|S_5233391|
20S50001424	Streptococcus_pyogenes	100/1976011	0.0051	1	2	0	Streptococcus	22089	11880	2	0	22679	12197	G+	0	26.25	0.052	574.439	-	-	id|82213036|BAC|R_1905559|	id|44851237|BAC|S_0143980|
20S50001424	Streptococcus_ratti	150/2062067	0.0073	1	3	0	Streptococcus	22089	11880	3	0	22679	12197	G+	0	26.25	0.0747	574.439	-	-	id|84055309|BAC|R_7637463|	id|21164157|BAC|S_8954217|
20S50001424	Streptococcus_sobrinus	50/2222133	0.0023	1	1	0	Streptococcus	22089	11880	1	0	22679	12197	G+	0	26.25	0.0231	574.439	-	-	id|44243622|BAC|R_3911199|	id|00711508|BAC|S_3249532|
20S50001424	Streptococcus_suis	823/2719245	0.0303	1.15	32	0	Streptococcus	22089	11880	33	0	22679	12197	G+	0.03	26.25	0.6041	574.439	0.87	0.64	id|85200488|BAC|R_0014538|	id|18131834|BAC|S_4906061|
20S50001424	Streptococcus_thermophilus	545/2102271	0.0259	1.09	12	0	Streptococcus	22089	11880	12	0	22679	12197	G+	0.01	26.25	0.293	574.439	0.92	1	id|69367032|BAC|R_1360351|	id|29716721|BAC|S_6565212|
20S50001424	Streptococcus_thoraltensis	44/2385688	0.0018	1	1	0	Streptococcus	22089	11880	1	0	22679	12197	G+	0	26.25	0.0215	574.439	-	-	id|67291525|BAC|R_6678351|	id|75319075|BAC|S_4631328|
20S50001424	Streptococcus_uberis	135/2024265	0.0067	1	3	0	Streptococcus	22089	11880	3	0	22679	12197	G+	0	26.25	0.0761	574.439	-	-	id|74911751|BAC|R_8955324|	id|09986449|BAC|S_7474892|
20S50001424	Streptococcus_varani	193/2460526	0.0078	1	4	0	Streptococcus	22089	11880	4	0	22679	12197	G+	0	26.25	0.0835	574.439	1	0.95	id|97658872|BAC|R_6282909|	id|07025715|BAC|S_1814166|
20S50001424	Granulicatella_adiacens	71430/1947256	3.67	1.03	1485	1210	Granulicatella	1500	1227	1525	1242	1540	1260	G+	1.79	1.81	39.1482	39.5899	0.99	1	id|50717063|BAC|R_8706096|	id|63289353|BAC|S_6129138|
20S50001424	Granulicatella_elegans	679/1743361	0.0389	1.08	15	1	Granulicatella	1500	1227	15	1	1540	1260	G+	0.02	1.81	0.4417	39.5899	0.92	0.78	id|22316778|BAC|R_4076163|	id|48705058|BAC|S_8585361|
20S50001424	Burkholderia_multivorans	51276/7305976	0.7018	1.3	1347	397	Burkholderia	1370	406	1383	408	1407	417	G-	0.43	0.44	9.4645	9.6145	0.77	0.78	id|89541806|BAC|R_5054397|	id|23459196|BAC|S_1712672|
20S50001424	Burkholderia_vietnamiensis	350/7918760	0.0044	1	7	6	Burkholderia	1370	406	7	6	1407	417	G-	0	0.44	0.0454	9.6145	1	0	id|82879060|BAC|R_8351946|	id|11387283|BAC|S_4368393|
20S50001424	Burkholderia_cenocepacia	46/8264826	0.0006	1	1	0	Burkholderia	1370	406	1	0	1407	417	G-	0	0.44	0.0062	9.6145	-	-	id|92814863|BAC|R_5809994|	id|47633230|BAC|S_7638737|
20S50001424	Burkholderia_contaminans	46/8628841	0.0005	1	1	0	Burkholderia	1370	406	1	0	1407	417	G-	0	0.44	0.0059	9.6145	-	-	id|30305113|BAC|R_5095520|	id|69725635|BAC|S_9905471|
20S50001424	Burkholderia_dolosa	100/6420420	0.0016	1	2	0	Burkholderia	1370	406	2	0	1407	417	G-	0	0.44	0.016	9.6145	-	-	id|92060739|BAC|R_5690173|	id|67056756|BAC|S_9173987|
20S50001424	Burkholderia_glumae	50/6874327	0.0007	1	1	0	Burkholderia	1370	406	1	0	1407	417	G-	0	0.44	0.0075	9.6145	-	-	id|11470423|BAC|R_2614272|	id|23140168|BAC|S_2962346|
20S50001424	Burkholderia_lata	50/8354859	0.0006	1	1	0	Burkholderia	1370	406	1	0	1407	417	G-	0	0.44	0.0061	9.6145	-	-	id|48356606|BAC|R_8149656|	id|31170293|BAC|S_0066261|
20S50001424	Burkholderia_oklahomensis	50/7319588	0.0007	1	1	0	Burkholderia	1370	406	1	0	1407	417	G-	0	0.44	0.007	9.6145	-	-	id|09229780|BAC|R_5772829|	id|70431754|BAC|S_7407022|
20S50001424	Burkholderia_pyrrocinia	140/8258170	0.0017	1	5	0	Burkholderia	1370	406	5	0	1407	417	G-	0	0.44	0.0311	9.6145	-	-	id|70837846|BAC|R_3107784|	id|18634490|BAC|S_6844251|
20S50001424	Burkholderia_stabilis	50/9093520	0.0005	1	2	0	Burkholderia	1370	406	2	0	1407	417	G-	0	0.44	0.0113	9.6145	-	-	id|79122145|BAC|R_1971313|	id|86105367|BAC|S_1213218|
20S50001424	Burkholderia_thailandensis	50/7004150	0.0007	1	1	0	Burkholderia	1370	406	1	0	1407	417	G-	0	0.44	0.0073	9.6145	-	-	id|80546028|BAC|R_5170216|	id|14373073|BAC|S_8687073|
20S50001424	Burkholderia_ubonensis	50/8277575	0.0006	1	1	0	Burkholderia	1370	406	1	0	1407	417	G-	0	0.44	0.0062	9.6145	-	-	id|60387266|BAC|R_5384392|	id|58415613|BAC|S_4916706|
20S50001424	Ralstonia_pickettii	2690/5485107	0.049	1	66	45	Ralstonia	70	53	68	46	72	54	G-	0.03	0.03	0.6177	0.655	1	0.98	id|19957164|BAC|R_0761049|	id|99940213|BAC|S_3917488|
20S50001424	Ralstonia_insidiosa	50/6115672	0.0008	1	1	0	Ralstonia	70	53	1	0	72	54	G-	0	0.03	0.0084	0.655	-	-	id|57984874|BAC|R_3851199|	id|44746198|BAC|S_8470464|
20S50001424	Ralstonia_mannitolilytica	50/5084427	0.001	1	2	0	Ralstonia	70	53	2	0	72	54	G-	0	0.03	0.0202	0.655	-	-	id|67486499|BAC|R_2176605|	id|01120019|BAC|S_3094637|
20S50001424	Ralstonia_solanacearum	50/5901078	0.0008	1	1	0	Ralstonia	70	53	1	0	72	54	G-	0	0.03	0.0087	0.655	-	-	id|83730196|BAC|R_4214406|	id|27878932|BAC|S_4697017|
20S50001424	Streptobacillus_notomytis	42868/1740881	2.46	1.92	1647	16	Streptobacillus	1650	16	1691	16	1694	16	G-	2.22	2.22	48.5661	48.6471	0.53	0.85	id|76372935|BAC|R_7255117|	id|01260713|BAC|S_4365644|
20S50001424	Streptobacillus_moniliformis	108/1900627	0.0057	1.39	3	0	Streptobacillus	1650	16	3	0	1694	16	G-	0	2.22	0.081	48.6471	-	-	id|17307621|BAC|R_5916492|	id|46382283|BAC|S_5316289|
20S50001424	Staphylococcus_epidermidis	100/2917718	0.0034	1	2	2	Staphylococcus	37	6	2	2	38	6	G+	0	0.03	0.0352	0.65	-	-	id|23425972|BAC|R_1019759|	id|81948656|BAC|S_6145183|
20S50001424	Staphylococcus_haemolyticus	1067/2952076	0.0361	1.49	32	2	Staphylococcus	37	6	33	2	38	6	G+	0.03	0.03	0.5565	0.65	0.67	0	id|14757659|BAC|R_1669254|	id|21767703|BAC|S_6480655|
20S50001424	Staphylococcus_auricularis	50/2216666	0.0023	1	1	1	Staphylococcus	37	6	1	1	38	6	G+	0	0.03	0.0232	0.65	-	-	id|28211458|BAC|R_1940891|	id|85138502|BAC|S_5020765|
20S50001424	Staphylococcus_pseudintermedius	100/2923654	0.0034	1	2	1	Staphylococcus	37	6	2	1	38	6	G+	0	0.03	0.0351	0.65	-	-	id|84504327|BAC|R_7456091|	id|91980604|BAC|S_1321134|
20S50001424	Catonella_morbi	194/3479274	0.0056	1.21	5	1	Catonella	5	1	5	1	5	1	G+	0	0	0.0738	0.0738	0.83	0	id|76662457|BAC|R_2442570|	id|83613604|BAC|S_4197249|
20S50001424	Globicatella_sanguinis	50/2412671	0.0021	1	1	0	Globicatella	1	1	1	0	1	1	G+	0	0	0.0213	0.0213	-	-	id|60679419|BAC|R_9737363|	id|75319366|BAC|S_5120773|
20S50001424	Lachnoanaerobaculum_saburreum	155/3075506	0.005	1.61	5	1	Lachnoanaerobaculum	5	1	5	1	5	1	G+	0	0	0.0835	0.0835	0.62	0	id|14849335|BAC|R_9425281|	id|00903593|BAC|S_5213486|
20S50001424	Lactobacillus_rossiae	90/2960779	0.003	1	2	1	Lactobacillus	14	1	2	1	14	1	G+	0	0.01	0.0347	0.3064	-	-	id|84799925|BAC|R_9928597|	id|85465107|BAC|S_4677617|
20S50001424	Lactobacillus_gastricus	50/1905662	0.0026	1	1	0	Lactobacillus	14	1	1	0	14	1	G+	0	0.01	0.0269	0.3064	-	-	id|38495813|BAC|R_9049181|	id|47088849|BAC|S_0743632|
20S50001424	Lactobacillus_hokkaidonensis	41/2336471	0.0018	1	1	0	Lactobacillus	14	1	1	0	14	1	G+	0	0.01	0.022	0.3064	-	-	id|93749415|BAC|R_7649901|	id|26943591|BAC|S_2089275|
20S50001424	Lactobacillus_kimchicus	41/2595540	0.0016	1	1	0	Lactobacillus	14	1	1	0	14	1	G+	0	0.01	0.0198	0.3064	-	-	id|32773841|BAC|R_0300279|	id|89861420|BAC|S_8598417|
20S50001424	Lactobacillus_parabrevis	50/2661270	0.0019	1	1	0	Lactobacillus	14	1	1	0	14	1	G+	0	0.01	0.0193	0.3064	-	-	id|49480463|BAC|R_3297696|	id|43168754|BAC|S_8050646|
20S50001424	Lactobacillus_paralimentarius	50/2754616	0.0018	1	1	0	Lactobacillus	14	1	1	0	14	1	G+	0	0.01	0.0186	0.3064	-	-	id|73917850|BAC|R_1669893|	id|86455532|BAC|S_2116698|
20S50001424	Lactobacillus_salivarius	295/2177092	0.0136	1.19	7	0	Lactobacillus	14	1	7	0	14	1	G+	0.01	0.01	0.1651	0.3064	0.84	0	id|61176033|BAC|R_5219770|	id|62897498|BAC|S_9438449|
20S50001424	Lautropia_mirabilis	100/3172010	0.0032	1	2	1	Lautropia	2	1	2	1	2	1	G-	0	0	0.0324	0.0324	-	-	id|54924612|BAC|R_5957036|	id|48261277|BAC|S_8489393|
20S50001424	Neisseria_subflava	50/2356146	0.0021	1	1	0	Neisseria	1	1	1	0	1	1	G-	0	0	0.0218	0.0218	-	-	id|52220681|BAC|R_5971587|	id|51793239|BAC|S_6138147|
20S50001424	Pseudomonas_aeruginosa	50/7411863	0.0007	1	1	1	Pseudomonas	2	1	1	1	2	1	G-	0	0	0.0069	0.0199	-	-	id|70470161|BAC|R_8459237|	id|01116727|BAC|S_0393240|
20S50001424	Pseudomonas_pachastrellae	50/3935234	0.0013	1	1	0	Pseudomonas	2	1	1	0	2	1	G-	0	0	0.013	0.0199	-	-	id|22302229|BAC|R_0425843|	id|34030380|BAC|S_8936829|
20S50001424	Lachnospiraceae_bacterium_oral_taxon_500	698/3201383	0.0218	1.79	25	18	-	-	-	26	18	-	-	G+	0.02	-	0.4009	-	0.56	0	id|14188186|BAC|R_5972132|	id|55961384|BAC|S_8452278|
20S50001424	Peptostreptococcaceae_bacterium_oral_taxon_113	200/2089533	0.0096	1.25	5	4	-	-	-	5	4	-	-	G+	0.01	-	0.1228	-	0.8	0	id|77192812|BAC|R_2435293|	id|46784637|BAC|S_9905685|
